# Supplementary material for: The next generation of protein super‐fibres: robust recombinant production and recovery of hagfish intermediate filament proteins with fibre spinning and mechanical–structural characterizations
Source: PubMed Central journal article supplement (PMC8449652; doi:10.1111/1751-7915.13869), 2021-06-30
Supplement: MBT2-14-1976-s001.pdf [file MBT2-14-1976-s001.pdf]

**Table S2.** Fermentation K12 medium.

---

| Initial Medium:                         |                       |
|-----------------------------------------|-----------------------|
| Potassium phosphate monobasic anhydrous | 2 g L <sup>-1</sup>   |
| Potassium phosphate dibasic trihydrate  | 4 g L <sup>-1</sup>   |
| Ammonium phosphate dibasic anhydrous    | 5 g L <sup>-1</sup>   |
| Yeast Extract                           | 5 g L <sup>-1</sup>   |
| Tryptone                                | 2.5 g L <sup>-1</sup> |

---

| Added after autoclaving of the initial medium: |                        |
|------------------------------------------------|------------------------|
| Glucose                                        | 25 g L <sup>-1</sup>   |
| Magnesium sulfate heptahydrate                 | 0.5 g L <sup>-1</sup>  |
| Thiamine                                       | 2.5 mg L <sup>-1</sup> |
| X1000 trace metal solution                     | 1 mL L <sup>-1</sup>   |

---

| Glucose feeding solution:      |                       |
|--------------------------------|-----------------------|
| Glucose                        | 500 g L <sup>-1</sup> |
| Tryptone                       | 10 g L <sup>-1</sup>  |
| Magnesium sulfate heptahydrate | 10 g L <sup>-1</sup>  |
| Thiamine                       | 40 mg L <sup>-1</sup> |
| X1000 trace metal              | 1 mL L <sup>-1</sup>  |

---

| [X1000] trace metal solution in water: |                         |
|----------------------------------------|-------------------------|
| Sodium chloride                        | 25 g L <sup>-1</sup>    |
| Zinc sulfate heptahydrate              | 5 g L <sup>-1</sup>     |
| Manganese chloride tetrahydrate        | 20 g L <sup>-1</sup>    |
| Ferric chloride hexahydrate            | 23.8 g L <sup>-1</sup>  |
| Cupric sulfate pentahydrate            | 2 g L <sup>-1</sup>     |
| Boric acid                             | 2.9 g L <sup>-1</sup>   |
| Sodium molybdate dihydrate             | 2.5 g L <sup>-1</sup>   |
| 6 N sulfuric acid                      | 62.5 mL L <sup>-1</sup> |

---
