# Supplementary material for: The next generation of protein super‐fibres: robust recombinant production and recovery of hagfish intermediate filament proteins with fibre spinning and mechanical–structural characterizations
Source: PubMed Central journal article supplement (PMC8449652; doi:10.1111/1751-7915.13869), 2021-06-30
Supplement: MBT2-14-1976-s002.pdf [file MBT2-14-1976-s002.pdf]

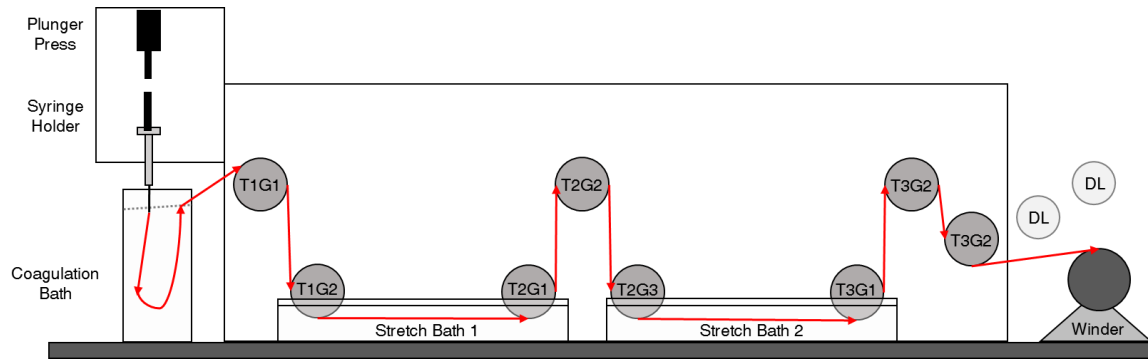

**Fig. S4.** Diagram of customized extrusion method and spinning instrument.
