# Supplementary material for: The next generation of protein super‐fibres: robust recombinant production and recovery of hagfish intermediate filament proteins with fibre spinning and mechanical–structural characterizations
Source: PubMed Central journal article supplement (PMC8449652; doi:10.1111/1751-7915.13869), 2021-06-30
Supplement: MBT2-14-1976-s006.pdf [file MBT2-14-1976-s006.pdf]

**Table S1.** BioFlo610 protein yields from cell mass purifications. Final BioFlo610 volumes were 95 L and 68 L and 19 kg and 13 kg for rHIF $\alpha$  and rHIF $\gamma_{(C387S)}$ , respectively.

| rHIF $\alpha$           |               |                       |                       |                                       |                                  |
|-------------------------|---------------|-----------------------|-----------------------|---------------------------------------|----------------------------------|
| Purification #          | Cell Mass (g) | Volume Equivalent (L) | Recovered Protein (g) | Volumetric Yield (g L <sup>-1</sup> ) | Mass Yield (g kg <sup>-1</sup> ) |
| 1                       | 400           | 2                     | 17                    | 8.5                                   | 42.5                             |
| 2                       | 400           | 2                     | 13                    | 6.5                                   | 32.5                             |
| 3                       | 400           | 2                     | 14                    | 7                                     | 35                               |
| 4                       | 400           | 2                     | 15                    | 7.5                                   | 37.5                             |
| 5                       | 400           | 2                     | 18                    | 9                                     | 45                               |
| 6                       | 400           | 2                     | 16                    | 8                                     | 40                               |
| Average                 | 400           | 2                     | 15.5 ± 1.9            | 7.8 ± 0.9                             | 38.8 ± 4.7                       |
| rHIF $\gamma_{(C387S)}$ |               |                       |                       |                                       |                                  |
| Purification #          | Cell Mass (g) | Volume Equivalent (L) | Recovered Protein (g) | Volumetric Yield (g L <sup>-1</sup> ) | Mass Yield (g kg <sup>-1</sup> ) |
| 1                       | 400           | 2.1                   | 15                    | 7.1                                   | 37.5                             |
| 2                       | 400           | 2.1                   | 19                    | 9                                     | 47.5                             |
| 3                       | 400           | 2.1                   | 20                    | 9.5                                   | 50                               |
| 4                       | 400           | 2.1                   | 17                    | 8.1                                   | 42.5                             |
| 5                       | 500           | 2.5                   | 23                    | 9                                     | 46                               |
| Average                 | 420 ± 45      | 2.2 ± 0.2             | 18.8 ±                | 8.5 ± 1.0                             | 44.7 ± 4.9                       |
