# Supplementary material for: The next generation of protein super‐fibres: robust recombinant production and recovery of hagfish intermediate filament proteins with fibre spinning and mechanical–structural characterizations
Source: Microb Biotechnol. 2021 Jun 30;14(5):1976–89. doi: 10.1111/1751-7915.13869 (PMC8449652; doi:10.1111/1751-7915.13869)
Supplement: Supplementary file 1 — Fig. S1. Pairwise comparisons of mechanical properties for all stretched fibres and β‐sheet content for all fibres, including as‐spun. An asterisk indicates a statistically significant difference with a P‐value ≤0.05, and a blank square indicates no statistically significant difference. [file MBT2-14-1976-s005.pdf]

| Tensile Strength (MPa) |                                   |                |            |          |              |          |                               |                                   |                               | Strain (mm mm <sup>-1</sup> ) |                                   |                |            |          |              |          |                               |                                   |                               |
|------------------------|-----------------------------------|----------------|------------|----------|--------------|----------|-------------------------------|-----------------------------------|-------------------------------|-------------------------------|-----------------------------------|----------------|------------|----------|--------------|----------|-------------------------------|-----------------------------------|-------------------------------|
|                        |                                   |                |            |          |              |          |                               |                                   |                               |                               |                                   |                |            |          |              |          |                               |                                   |                               |
|                        | rHIFa 1X1X                        | rHIFa 1.5X1.5X | rHIFa 2X2X | 1:1 1X1X | 1:1 1.5X1.5X | 1:1 2X2X | rHIF <sub>Y(C387S)</sub> 1X1X | rHIF <sub>Y(C387S)</sub> 1.5X1.5X | rHIF <sub>Y(C387S)</sub> 2X2X |                               | rHIFa 1X1X                        | rHIFa 1.5X1.5X | rHIFa 2X2X | 1:1 1X1X | 1:1 1.5X1.5X | 1:1 2X2X | rHIF <sub>Y(C387S)</sub> 1X1X | rHIF <sub>Y(C387S)</sub> 1.5X1.5X | rHIF <sub>Y(C387S)</sub> 2X2X |
|                        | —                                 | —              | *          | *        | *            | *        | *                             | *                                 | *                             |                               | —                                 | —              | *          | *        | *            | *        | *                             | *                                 | *                             |
|                        | rHIFa 1X1X                        | —              | *          | *        | *            | *        | *                             | *                                 | *                             |                               | rHIFa 1X1X                        | —              | *          | *        | *            | *        | *                             | *                                 | *                             |
|                        | rHIFa 1.5X1.5X                    | —              | *          | *        | *            | *        | *                             | *                                 | *                             |                               | rHIFa 1.5X1.5X                    | —              | *          | *        | *            | *        | *                             | *                                 | *                             |
|                        | rHIFa 2X2X                        | —              | —          | *        | *            | *        | *                             | *                                 | *                             |                               | rHIFa 2X2X                        | —              | —          | *        | *            | *        | *                             | *                                 | *                             |
|                        | 1:1 1X1X                          | —              | —          | —        | *            | *        | *                             | *                                 | *                             |                               | 1:1 1X1X                          | —              | —          | —        | *            | *        | *                             | *                                 | *                             |
|                        | 1:1 1.5X1.5X                      | —              | —          | —        | —            | —        | *                             | *                                 | *                             |                               | 1:1 1.5X1.5X                      | —              | —          | —        | —            | *        | *                             | *                                 | *                             |
|                        | 1:1 2X2X                          | —              | —          | —        | —            | —        | —                             | *                                 | *                             |                               | 1:1 2X2X                          | —              | —          | —        | —            | —        | *                             | *                                 | *                             |
|                        | rHIF <sub>Y(C387S)</sub> 1X1X     | —              | —          | —        | —            | —        | —                             | —                                 | *                             |                               | rHIF <sub>Y(C387S)</sub> 1X1X     | —              | —          | —        | —            | —        | —                             | *                                 | *                             |
|                        | rHIF <sub>Y(C387S)</sub> 1.5X1.5X | —              | —          | —        | —            | —        | —                             | —                                 | —                             |                               | rHIF <sub>Y(C387S)</sub> 1.5X1.5X | —              | —          | —        | —            | —        | —                             | —                                 | *                             |
|                        | rHIF <sub>Y(C387S)</sub> 2X2X     | —              | —          | —        | —            | —        | —                             | —                                 | —                             |                               | rHIF <sub>Y(C387S)</sub> 2X2X     | —              | —          | —        | —            | —        | —                             | —                                 | —                             |

| Toughness (MJ m <sup>-3</sup> ) |                                   |                |            |          |              |          |                               |                                   |                               | Elastic Modulus (GPa) |                                   |                |            |          |              |          |                               |                                   |                               |
|---------------------------------|-----------------------------------|----------------|------------|----------|--------------|----------|-------------------------------|-----------------------------------|-------------------------------|-----------------------|-----------------------------------|----------------|------------|----------|--------------|----------|-------------------------------|-----------------------------------|-------------------------------|
|                                 |                                   |                |            |          |              |          |                               |                                   |                               |                       |                                   |                |            |          |              |          |                               |                                   |                               |
|                                 | rHIFa 1X1X                        | rHIFa 1.5X1.5X | rHIFa 2X2X | 1:1 1X1X | 1:1 1.5X1.5X | 1:1 2X2X | rHIF <sub>Y(C387S)</sub> 1X1X | rHIF <sub>Y(C387S)</sub> 1.5X1.5X | rHIF <sub>Y(C387S)</sub> 2X2X |                       | rHIFa 1X1X                        | rHIFa 1.5X1.5X | rHIFa 2X2X | 1:1 1X1X | 1:1 1.5X1.5X | 1:1 2X2X | rHIF <sub>Y(C387S)</sub> 1X1X | rHIF <sub>Y(C387S)</sub> 1.5X1.5X | rHIF <sub>Y(C387S)</sub> 2X2X |
|                                 | —                                 | —              | *          | *        | *            | *        | *                             | *                                 | *                             |                       | —                                 | —              | *          | *        | *            | *        | *                             | *                                 | *                             |
|                                 | rHIFa 1X1X                        | —              | *          | *        | *            | *        | *                             | *                                 | *                             |                       | rHIFa 1X1X                        | —              | *          | *        | *            | *        | *                             | *                                 | *                             |
|                                 | rHIFa 1.5X1.5X                    | —              | —          | *        | *            | *        | *                             | *                                 | *                             |                       | rHIFa 1.5X1.5X                    | —              | —          | *        | *            | *        | *                             | *                                 | *                             |
|                                 | rHIFa 2X2X                        | —              | —          | —        | *            | *        | *                             | *                                 | *                             |                       | rHIFa 2X2X                        | —              | —          | —        | *            | *        | *                             | *                                 | *                             |
|                                 | 1:1 1X1X                          | —              | —          | —        | —            | *        | *                             | *                                 | *                             |                       | 1:1 1X1X                          | —              | —          | —        | —            | *        | *                             | *                                 | *                             |
|                                 | 1:1 1.5X1.5X                      | —              | —          | —        | —            | —        | *                             | *                                 | *                             |                       | 1:1 1.5X1.5X                      | —              | —          | —        | —            | —        | *                             | *                                 | *                             |
|                                 | 1:1 2X2X                          | —              | —          | —        | —            | —        | —                             | *                                 | *                             |                       | 1:1 2X2X                          | —              | —          | —        | —            | —        | —                             | *                                 | *                             |
|                                 | rHIF <sub>Y(C387S)</sub> 1X1X     | —              | —          | —        | —            | —        | —                             | —                                 | *                             |                       | rHIF <sub>Y(C387S)</sub> 1X1X     | —              | —          | —        | —            | —        | —                             | —                                 | *                             |
|                                 | rHIF <sub>Y(C387S)</sub> 1.5X1.5X | —              | —          | —        | —            | —        | —                             | —                                 | —                             |                       | rHIF <sub>Y(C387S)</sub> 1.5X1.5X | —              | —          | —        | —            | —        | —                             | —                                 | —                             |
|                                 | rHIF <sub>Y(C387S)</sub> 2X2X     | —              | —          | —        | —            | —        | —                             | —                                 | —                             |                       | rHIF <sub>Y(C387S)</sub> 2X2X     | —              | —          | —        | —            | —        | —                             | —                                 | —                             |

| β -Sheet Content (%) |                                   |            |                |            |             |          |              |          |                                  |
|----------------------|-----------------------------------|------------|----------------|------------|-------------|----------|--------------|----------|----------------------------------|
|                      |                                   |            |                |            |             |          |              |          |                                  |
|                      | rHIFa As-Spun                     | rHIFa 1X1X | rHIFa 1.5X1.5X | rHIFa 2X2X | 1:1 As-Spun | 1:1 1X1X | 1:1 1.5X1.5X | 1:1 2X2X | rHIF <sub>Y(C387S)</sub> As-Spun |
|                      | —                                 | *          | *              | *          | *           | *        | *            | *        | *                                |
|                      | rHIFa As-Spun                     | —          | —              | —          | *           | *        | *            | *        | *                                |
|                      | rHIFa 1X1X                        | —          | —              | —          | —           | *        | *            | *        | *                                |
|                      | rHIFa 1.5X1.5X                    | —          | —              | —          | —           | —        | *            | *        | *                                |
|                      | rHIFa 2X2X                        | —          | —              | —          | —           | —        | —            | *        | *                                |
|                      | 1:1 As-Spun                       | —          | —              | —          | —           | —        | —            | —        | *                                |
|                      | 1:1 1X1X                          | —          | —              | —          | —           | —        | —            | —        | *                                |
|                      | 1:1 1.5X1.5X                      | —          | —              | —          | —           | —        | —            | —        | *                                |
|                      | 1:1 2X2X                          | —          | —              | —          | —           | —        | —            | —        | *                                |
|                      | rHIF <sub>Y(C387S)</sub> As-Spun  | —          | —              | —          | —           | —        | —            | —        | *                                |
|                      | rHIF <sub>Y(C387S)</sub> 1X1X     | —          | —              | —          | —           | —        | —            | —        | *                                |
|                      | rHIF <sub>Y(C387S)</sub> 1.5X1.5X | —          | —              | —          | —           | —        | —            | —        | *                                |
|                      | rHIF <sub>Y(C387S)</sub> 2X2X     | —          | —              | —          | —           | —        | —            | —        | *                                |
